# Supplementary material for: The high fluorescence sensitivity property and quenching mechanism of one-dimensional Cd-HCIA-1 sensor for nitrobenzene
Source: Royal Society of Chemistry journal article supplement (doi:10.1039/d3cp00295k), 2023-01-01
Supplement: d3cp00295k1.pdf [file d3cp00295k1.pdf]

Electronic Supplementary Information

**The high fluorescence sensitivity property and quenching  
mechanism of one-dimensional Cd-HCIA-1 sensor for  
nitrobenzene**

Xiaoming Song, Wenzhuo Dong, Xiufang Hou\*, Qingxia Zhao,  
Zhuangzhuang Zhang, Yixia Ren\*

Shaanxi Key Laboratory of Chemical Reaction Engineering, Laboratory of New  
Energy and New Function Materials, College of Chemistry and Chemical Engineering,  
Yan'an University, Yan'an, Shaanxi 716000, China

\*E-mail: houxiufang@yau.edu.cn, renyixia1@163.com

Table S1. Crystal data and structure refinement for Cd-HCIA-1

| Cd-HCIA-1                               |                                                                                |
|-----------------------------------------|--------------------------------------------------------------------------------|
| Empirical formula                       | C <sub>52</sub> H <sub>48</sub> Cd <sub>2</sub> N <sub>4</sub> O <sub>19</sub> |
| M                                       | 1257.75                                                                        |
| Crystal system                          | Triclinic                                                                      |
| Space group                             | $P\bar{1}$                                                                     |
| a,(Å)                                   | 10.116(3)                                                                      |
| b,(Å)                                   | 10.401(4)                                                                      |
| c,(Å)                                   | 13.707(5)                                                                      |
| $\alpha$ (°)                            | 92.118(5)                                                                      |
| $\beta$ (°)                             | 106.385(5)                                                                     |
| $\gamma$ (°)                            | 116.737(5)                                                                     |
| V(Å <sup>3</sup> )                      | 1212.9(7)                                                                      |
| Z                                       | 1                                                                              |
| $\rho$ calcd, g/cm <sup>-3</sup>        | 1.722                                                                          |
| $\mu$ , mm <sup>-1</sup>                | 0.963                                                                          |
| F(000)                                  | 636.0                                                                          |
| 2 $\theta$ range for data collected/°   | 4.724 to 57.092                                                                |
| Reflections collected/unique            | 7705                                                                           |
| GOF                                     | 1.062                                                                          |
| Final R indexes [ $I \geq 2\sigma(I)$ ] | R <sub>1</sub> =0.0289,wR <sub>2</sub> =0.0713                                 |
| Final R indexes [all data]              | R <sub>1</sub> =0.0332,wR <sub>2</sub> =0.0736                                 |
| Largest diff,peak/hole/e Å <sup>3</sup> | 0.69/-0.61                                                                     |

Table S2 Selected bonds and angles for Cd-HCIA-1 (Å and °).

| Cd-HCIA-1       |            |           |           |           |           |
|-----------------|------------|-----------|-----------|-----------|-----------|
| Bond lengths(Å) |            |           |           |           |           |
| Cd1-O1          | 2.578(2)   | Cd1-O4    | 2.352(2)  | Cd1-N2    | 2.303(2)  |
| Cd1-O2          | 2.2602(18) | Cd1-O6    | 2.344(2)  | –         | –         |
| Cd1-O3          | 2.4965(19) | Cd1-N1    | 2.306(2)  | –         | –         |
| Bond angles(°)  |            |           |           |           |           |
| O1-Cd1-C1       | 26.52(7)   | O3-Cd1-O1 | 160.64(7) | N1-Cd1-O4 | 101.07(8) |
| O2-Cd1-O1       | 53.30(6)   | O4-Cd1-O1 | 135.28(6) | N1-Cd1-O6 | 161.58(8) |
| O2-Cd1-O3       | 135.91(6)  | O4-Cd1-O3 | 52.90(6)  | N1-Cd1-C1 | 96.77(7)  |
| O2-Cd1-O4       | 83.04(7)   | O4-Cd1-C1 | 109.11(7) | N2-Cd1-O1 | 91.03(6)  |
| O2-Cd1-O6       | 96.15(7)   | O6-Cd1-O3 | 86.78(7)  | N2-Cd1-O3 | 81.58(6)  |
| O2-Cd1-N1       | 95.84(8)   | O6-Cd1-O4 | 94.21(8)  | N2-Cd1-O4 | 133.69(7) |
| O2-Cd1-N2       | 142.06(7)  | O6-Cd1-C1 | 87.76(7)  | N2-Cd1-O6 | 90.80(7)  |
| O2-Cd1-C1       | 26.87(7)   | O6-Cd1-O1 | 82.70(7)  | N2-Cd1-N1 | 71.22(8)  |
| O3-Cd1-C1       | 167.06(6)  | N1-Cd1-O1 | 93.38(7)  | N2-Cd1-C1 | 170.8(7)  |
|                 |            | N1-Cd1-O3 | 94.24(7)  |           |           |

Symmetry transformations used to generate equivalent atoms: #1 -1+x,+y,+z; #2 -x,-y,1-z;#3 1+x,+y,+z

Table S3 HOMO, LUMO and energy gap ( $E_g$ ) calculated by the B3LYP, CAM-B3LYP, M06-2X and  $\omega$ -B97XD methods and related experimental results of Cd-HCIA-1 in eV.

|                 | HOMO  | LUMO  | $E_g$ (theoretical) | $E_g$ (experiment) |
|-----------------|-------|-------|---------------------|--------------------|
| B3LYP           | -6.28 | -2.48 | 3.80                |                    |
| CAM-B3LYP       | -7.97 | -0.98 | 6.99                | 3.64               |
| M06-2X          | -8.01 | -1.29 | 6.72                |                    |
| $\omega$ -B97XD | -8.54 | -0.39 | 8.15                |                    |

Table S4 The maximum absorption peak (S0-&gt;S4) for Cd-HCIA-1 by different density functionals in Time-Dependent DFT (TDDFT) and experimental result.

| Functional | Theoretical result (nm) | Oscillator strength ( $f$ ) | Experimental result (nm) |
|------------|-------------------------|-----------------------------|--------------------------|
| B3LYP      | 305.11                  | 0.0817                      |                          |
| CAM-B3LYP  | 272.73                  | 0.4308                      | 286.00                   |
| M06-2X     | 268.62                  | 0.4200                      |                          |

|                 |        |        |
|-----------------|--------|--------|
| $\omega$ -B97XD | 270.67 | 0.4332 |
|-----------------|--------|--------|

Table S5. Calculated (Calcd value) and experimental (Explt value) geometric parameters of periodic structure and cluster model in the S<sub>0</sub> state.

|                    | Periodic (Calcd) | Cluster (Calcd) | Complex (Explt) |
|--------------------|------------------|-----------------|-----------------|
| Bond length (Å)    |                  |                 |                 |
| Cd1-O1             | 2.63             | 2.46            | 2.57            |
| Cd1-O3             | 2.47             | 2.63            | 2.50            |
| Cd1-O6             | 2.35             | 2.35            | 2.34            |
| Cd1-N1             | 2.30             | 2.31            | 2.31            |
| Cd1-N2             | 2.35             | 2.35            | 2.30            |
| Bond angle (°)     |                  |                 |                 |
| O3-Cd1-O1          | 169.5            | 169.5           | 160.6           |
| O2-Cd1-O4          | 76.80            | 77.10           | 83.04           |
| N2-Cd1-N1          | 71.92            | 71.99           | 71.22           |
| N1-Cd1-O6          | 161.4            | 161.4           | 161.6           |
| Dihedral angle (°) |                  |                 |                 |
| C17-N1-Cd1-N2      | 177.6            | 177.6           | 176.6           |
| C8-O3-Cd1-O2       | -3.44            | -3.34           | -3.51           |
| C1-O1-Cd1-O6       | 98.16            | 100.3           | 99.70           |

Table S6 MOFs for the determination of NB

| MOFs                                                                                                   | Analyte | K <sub>sv</sub> (M <sup>-1</sup> ) | LOD (μM)             | Refs.     |
|--------------------------------------------------------------------------------------------------------|---------|------------------------------------|----------------------|-----------|
| Cd-HCIA-1                                                                                              | NB      | 6.30×10 <sup>6</sup>               | 0.00303              | This work |
| [Zn (L) <sub>0.5</sub> (bpb) <sub>0.5</sub> (H <sub>2</sub> O) <sub>2</sub> ] <sub>n</sub>             | NB      | 8.53 × 10 <sup>4</sup>             | 0.2                  | [1]       |
| Eu <sup>3+</sup> @MIL-121                                                                              | NB      | 2.68×10 <sup>6</sup>               | 0.00156              | [2]       |
| [Zn(HNTB)(phen)] <sub>n</sub>                                                                          | NB      | 60.75                              | 753                  | [3]       |
| Cd-MOF                                                                                                 | NB      | 4.19×10 <sup>6</sup>               | 0.0716               | [4]       |
| [Eu <sub>2</sub> (MPDA) <sub>3</sub> (H <sub>2</sub> O) <sub>2</sub> ] <sub>2</sub> ·2H <sub>2</sub> O | NB      | 1.03 × 10 <sup>4</sup>             | 5.69                 | [5]       |
| Zn <sub>3</sub> (BCT) <sub>2</sub> : 4% Eu(III)                                                        | NB      | 2.05 × 10 <sup>3</sup>             | 0.00788              | [6]       |
| Eu-MOF                                                                                                 | NB      | 1.33×10 <sup>4</sup>               | 0.028                | [7]       |
| Cu-MOF-1                                                                                               | NB      | 1.31×10 <sup>5</sup>               | 7.6×10 <sup>-4</sup> | [8]       |

Table S7 Quenching response time of different concentrations of NB to Cd-HCIA-1

|                   | $2 \times 10^{-4}$ mol/L | $1 \times 10^{-4}$ mol/L | $2 \times 10^{-5}$ mol/L | $1 \times 10^{-5}$ mol/L | $2 \times 10^{-6}$ mol/L |
|-------------------|--------------------------|--------------------------|--------------------------|--------------------------|--------------------------|
| Reaction time (s) | 75                       | 121                      | 159                      | 188                      | 198                      |

Table S8. Average excited state lifetime values ( $\langle \tau \rangle$ ) of Cd-HCIA-1 before and after addition of NB.

|               | $a_1(\%)$ | $a_2(\%)$ | $\tau_1(\text{ns})$ | $\tau_2(\text{ns})$ | $\langle \tau \rangle^*(\text{ns})$ |
|---------------|-----------|-----------|---------------------|---------------------|-------------------------------------|
| Cd-HCIA-1     | 99.22     | 0.78      | 0.44                | 3.88                | 0.447                               |
| Treated by NB | 97.51     | 2.49      | 0.20                | 1.55                | 0.234                               |

where  $\langle \tau \rangle^*$  represents the actual average fluorescence lifetime.

Table S9. Absorption wavelength ( $\lambda/\text{nm}$ ), electronic transition and oscillator strengths ( $f$ ) of Cd-HCIA-1 at the CAM-B3LYP theory level with LR or SS relative to experimental data ( $\lambda_{\text{Exp}}/\text{nm}$ ).

|    | electronic transition | $\lambda/\text{nm}$ | $f$    | $\lambda_{\text{Exp}}/\text{nm}$ |
|----|-----------------------|---------------------|--------|----------------------------------|
| LR | $S_0 \rightarrow S_1$ | 280                 | 0.0826 |                                  |
|    | $S_0 \rightarrow S_4$ | 273                 | 0.4308 | 286                              |
| SS | $S_0 \rightarrow S_1$ | 281                 | 0.0627 |                                  |

Table S10 Hole-electron analysis index of Cd-HCIA-1.

|                | Energy<br>(eV) | D (Å) | Sr    | H (Å) | t (Å)  | $\Delta \sigma$ (Å) |
|----------------|----------------|-------|-------|-------|--------|---------------------|
| NB@Cd-HCIA-1   | 3.571          | 2.306 | 0.369 | 2.641 | 0.901  | -0.556              |
| PhOH@Cd-HCIA-1 | 4.186          | 1.363 | 0.480 | 2.944 | -0.199 | 0.253               |

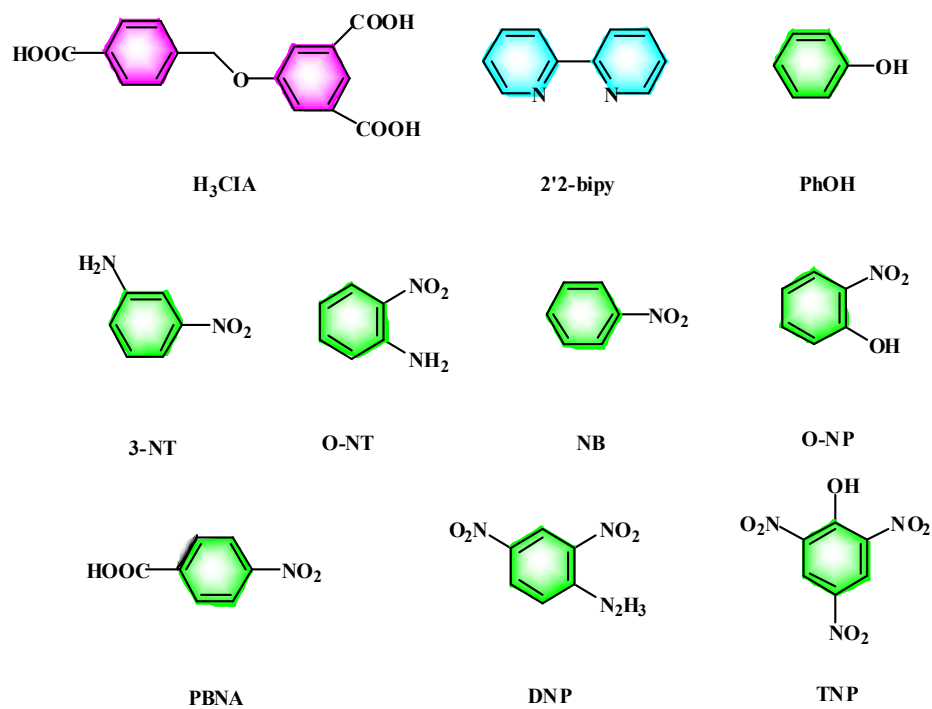

Fig. S1 Molecular structures of ligand structure in Cd-HCIA-1 and the selected nitro-detection species.

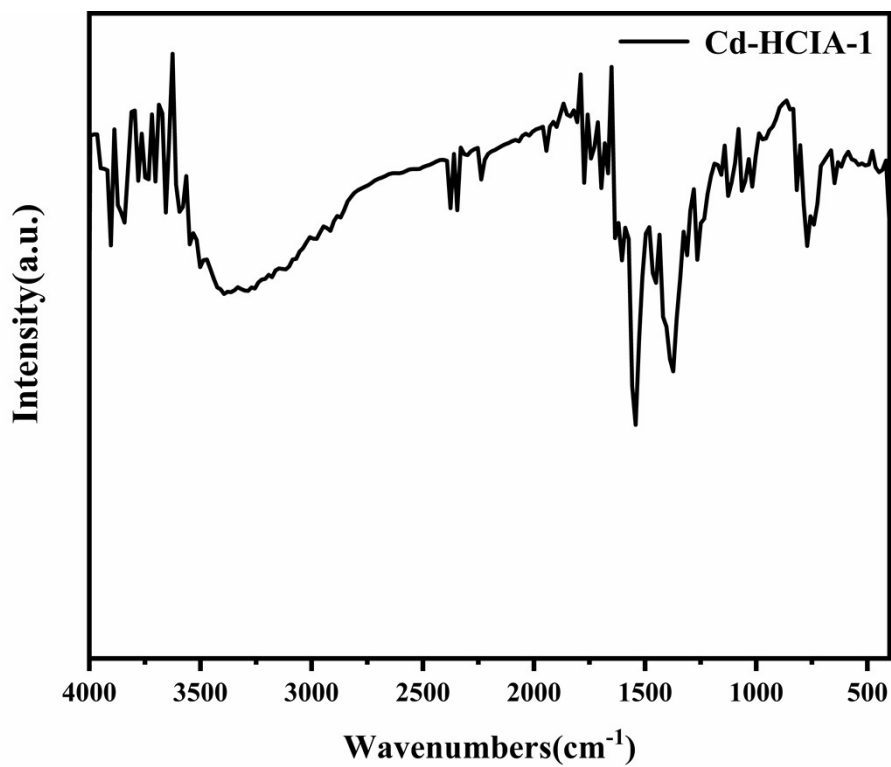

Fig. S2 The FT-IR spectra of Cd-HCIA-1.

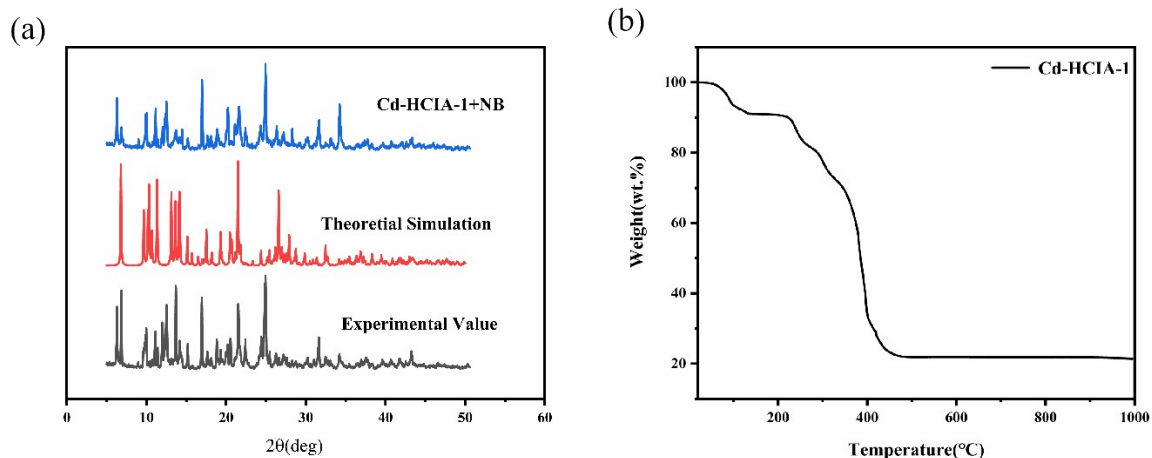

Fig. S3 (a) XRD patterns of simulated, experimental and Cd-HCIA-1 after selective experiments of NB.(b) The TGA curve for Cd-HCIA-1

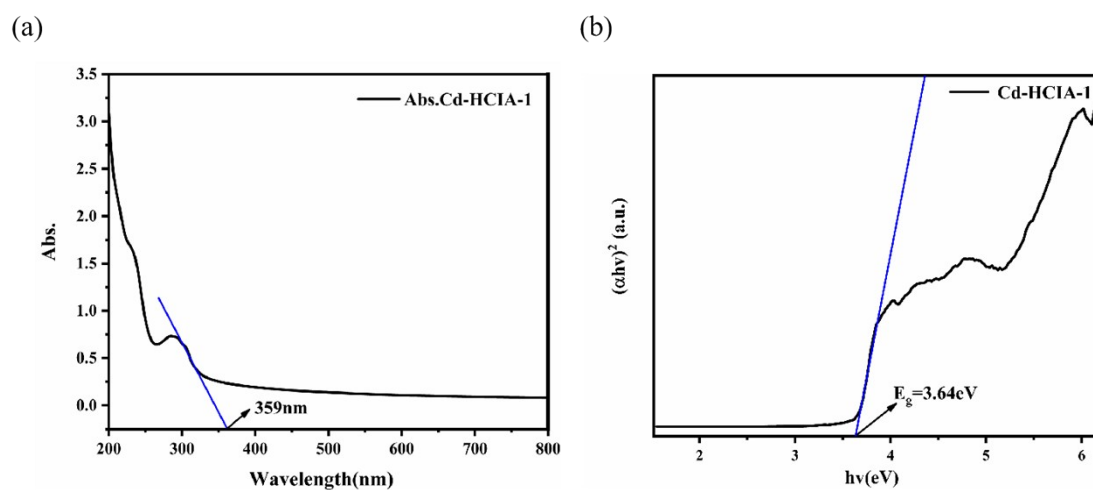

Fig. S4 UV-visible absorption spectra of Cd-HCIA-1. (b) Optical band gap energy plots of Cd-HCIA-1.

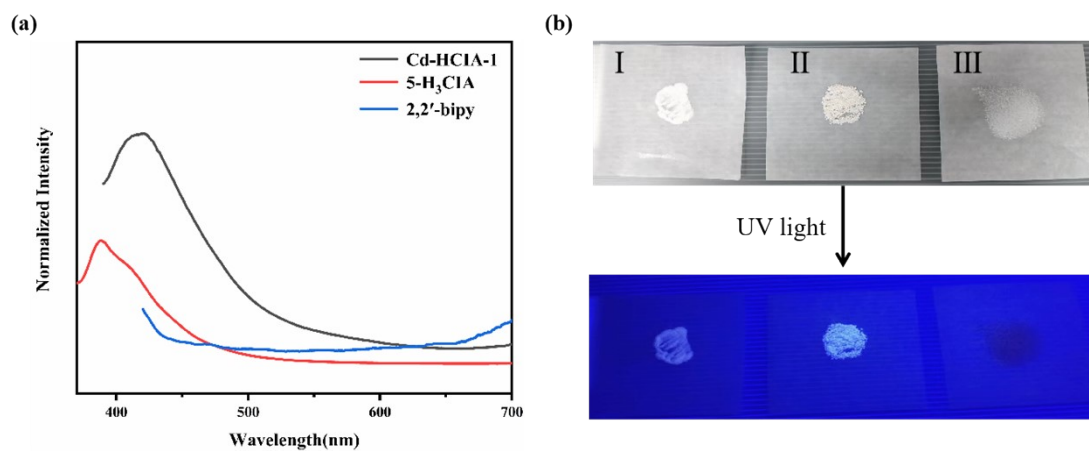

Fig. S5 (a) Solid emission spectra of Cd-HCIA-1 ( $\lambda_{\text{ex}} = 364 \text{ nm}$ ) and ligand 5-H<sub>3</sub>CIA ( $\lambda_{\text{ex}} = 364.2 \text{ nm}$ ), 2-bipy ( $\lambda_{\text{ex}} = 397.0 \text{ nm}$ ) (b) Color of the sample under natural light and ultraviolet light. I: Cd-HCIA-1, II: 5-H<sub>3</sub>CIA, III: 2,2'-bipy.

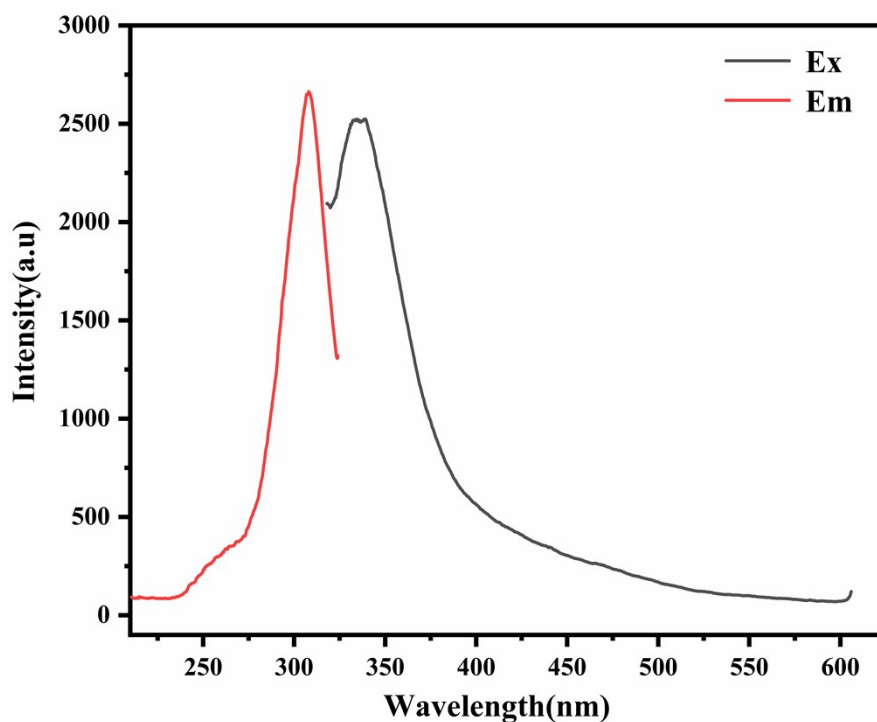

Fig. S6 Fluorescence emission spectrum of Cd-HCIA-1 in water ( $\lambda_{\text{ex}} = 308.0 \text{ nm}$ ) and excitation spectrum ( $\lambda_{\text{em}} = 334.8 \text{ nm}$ ).

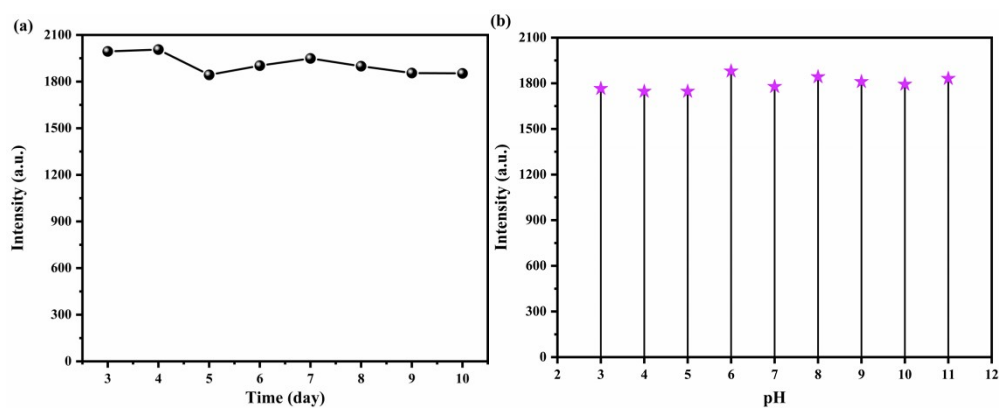



Fig. S7. (a) The intensity of the emission spectrum of Cd-HCIA-1 dispersed over different times and (b) emission intensity after treatment with different pH values solvent at the same time period,  $\lambda_{\text{ex}} = 308.0 \text{ nm}$ .

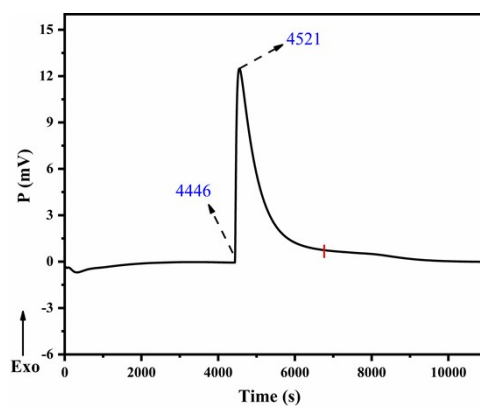

Fig. S8 Heat flow over time in NB@Cd-HCIA-1 system,  $c(\text{NB}) = 2 \times 10^{-4} \text{ mol/L}$ .

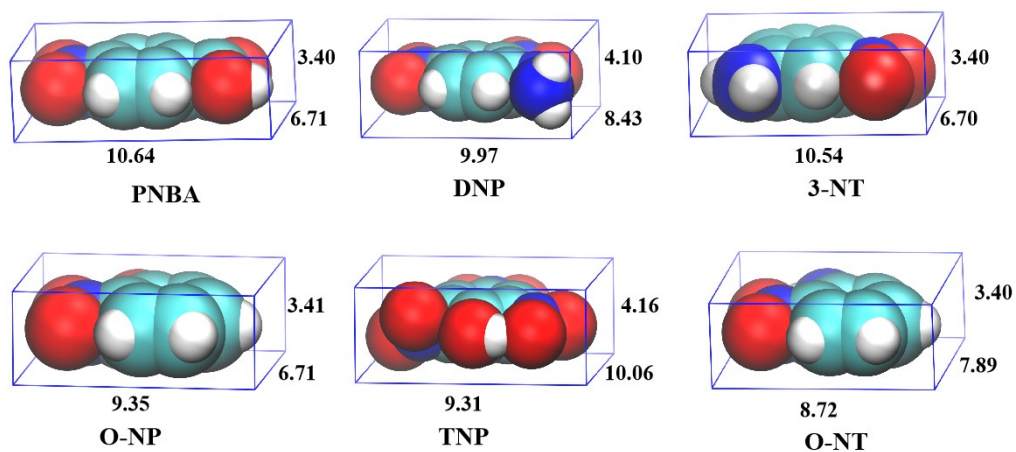

Fig. S9 The blue cuboids marked with width, height, and depth ( $\text{Å}$ ) represent the volumes of nitro-detection species, respectively.

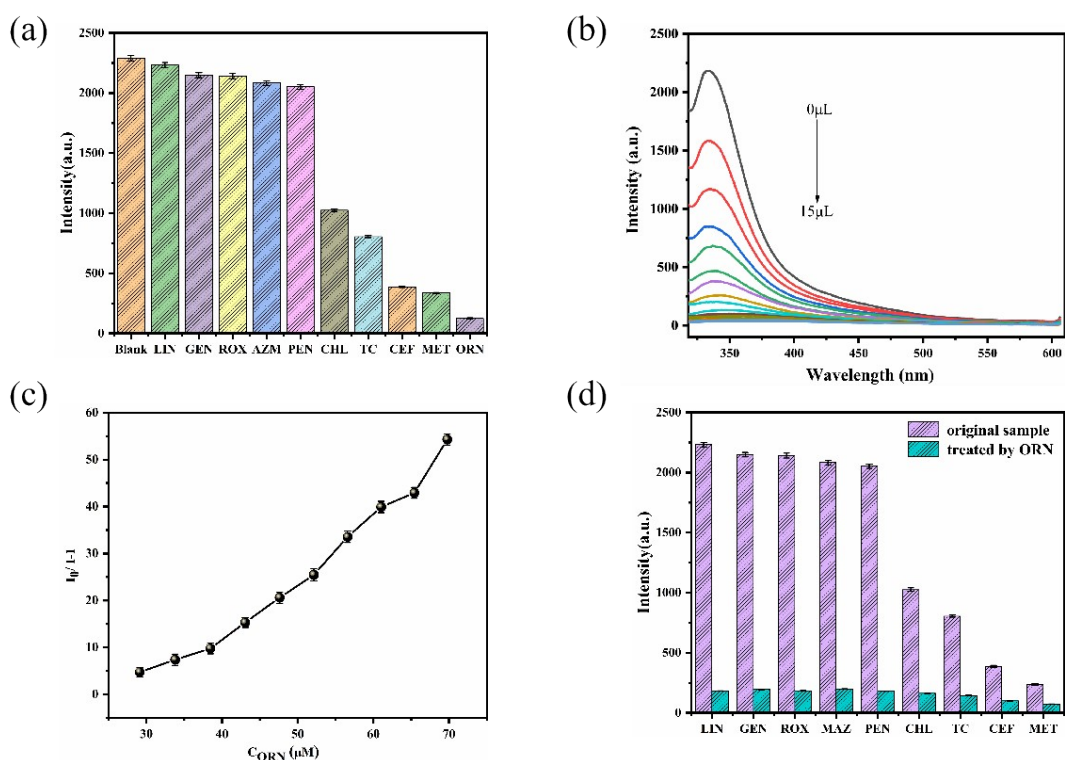

Fig. S10 (a) Fluorescence intensity of Cd-HCIA-1 in different antibiotic solutions. (b) Fluorescence quenching of Cd-HCIA-1 dispersed by gradually increasing the concentration of ornidazole. (c) Linear Stern–Volmer curve of  $I_0 / I - 1$  of ornidazole at a low concentration range. (d) After addition of other antibiotic solutions and ornidazole, the fluorescence intensity of Cd-HCIA-1 changes.

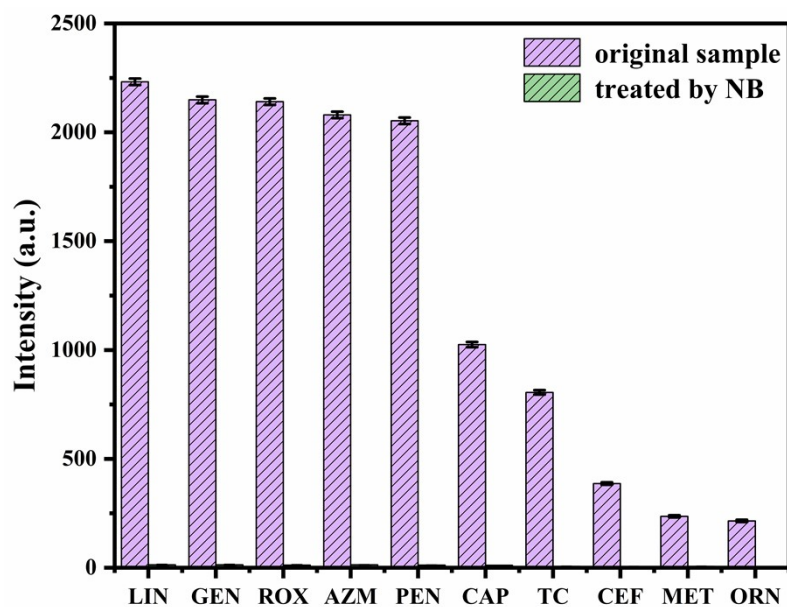

Fig S11. Fluorescence intensity of stable supernatant when antibiotic molecules are present and after addition of nitrobenzene.

The cartesian coordinates of all the optimized structures

1. Cartesian coordinates for structural optimization of Cd-HCIA-1 in  $S_0$

|    |             |             |             |
|----|-------------|-------------|-------------|
| Cd | -4.44212100 | -0.18147600 | 0.14589100  |
| O  | -2.93931300 | -1.60747900 | -0.94488900 |
| O  | -4.08628000 | -7.83268200 | -0.07836100 |
| O  | 0.95833900  | -4.97570700 | -1.37611900 |
| O  | -3.76970600 | -0.37898500 | 2.38707900  |
| H  | -4.19051200 | -5.31375400 | -0.45006000 |
| H  | -0.35819600 | -7.11975000 | -1.19147500 |
| H  | -0.74838600 | -2.84054300 | -1.10137900 |
| H  | 1.23005700  | -3.08778000 | -2.20168100 |
| H  | 1.43594700  | -3.18856600 | -0.43593300 |
| H  | -1.62360300 | -0.60642000 | 0.95503100  |
| H  | -1.13416300 | -1.41578000 | 5.14935400  |
| H  | 3.01161000  | -3.57698400 | -3.68925600 |
| H  | -4.20778000 | -0.17351700 | -3.06058100 |
| N  | -5.77264200 | 0.02808200  | -1.72696000 |
| N  | -6.67178800 | 0.03089600  | 0.85892100  |
| C  | -3.34973400 | -2.73003600 | -0.48179500 |
| C  | -2.55517400 | -3.95857400 | -0.79139300 |
| C  | -3.14080200 | -5.21848100 | -0.68644100 |
| C  | -2.35054500 | -6.36453200 | -0.83710700 |
| C  | -0.98556100 | -6.24397600 | -1.09627000 |
| C  | -0.39718300 | -4.97746000 | -1.18990600 |
| C  | -1.18203800 | -3.82733800 | -1.05863100 |
| C  | -2.94184100 | -7.72122500 | -0.64961000 |
| C  | 1.62141400  | -3.69611700 | -1.38532300 |
| C  | 3.08729000  | -3.94911400 | -1.57401600 |
| C  | -1.54469600 | -0.99823600 | 3.07163900  |
| C  | 3.64558800  | -3.83812100 | -2.85143800 |
| C  | -2.98393300 | -0.73110200 | 3.28575600  |
| C  | -5.27904600 | -0.02637200 | -2.97162700 |
| C  | -7.09872700 | 0.20262700  | -1.52518800 |
| C  | -7.58574700 | 0.23450700  | -0.11879100 |
| O  | -4.36114900 | 2.26574800  | 0.44997700  |
| C  | -7.05396500 | 0.04504500  | 2.14519400  |
| C  | 3.90971100  | -4.29579900 | -0.49238400 |
| C  | -0.98745700 | -0.86479300 | 1.79027200  |
| C  | -0.71781600 | -1.32245200 | 4.15701700  |
| C  | 5.00327100  | -4.04402200 | -3.05121600 |
| O  | -3.37694100 | -0.87247300 | 4.54470900  |
| C  | -6.08788200 | 0.09455700  | -4.09769100 |
| C  | -7.96281900 | 0.33875800  | -2.61444200 |
| C  | -8.93525900 | 0.44991900  | 0.19545500  |
| C  | -3.21681500 | 2.37717000  | -0.12100600 |
| C  | -8.37971800 | 0.24876000  | 2.52217100  |
| H  | -6.27705600 | -0.11408200 | 2.88461000  |
| H  | 3.48541400  | -4.38196300 | 0.50004200  |
| C  | 5.27291100  | -4.50168100 | -0.68447200 |
| C  | 0.37574600  | -1.07066800 | 1.59818800  |
| C  | 0.63987000  | -1.52834400 | 3.95724000  |
| C  | 5.83013900  | -4.36828500 | -1.96584600 |

|   |              |             |             |
|---|--------------|-------------|-------------|
| H | 5.41975700   | -3.95055800 | -4.04349600 |
| H | -4.32783400  | -0.67569000 | 4.61108900  |
| C | -7.45282800  | 0.28268700  | -3.90846600 |
| H | -5.64422900  | 0.04959100  | -5.08386800 |
| H | -9.02476500  | 0.47760500  | -2.47199700 |
| H | -9.66977400  | 0.61615400  | -0.57915500 |
| C | -9.33626500  | 0.45086700  | 1.52955500  |
| C | -2.62580900  | 3.73392700  | -0.30987100 |
| H | -8.63827900  | 0.25602600  | 3.57345600  |
| H | 5.90996900   | -4.75415700 | 0.15164300  |
| H | 0.79965100   | -0.98324400 | 0.60574400  |
| C | 1.19816500   | -1.41735600 | 2.67981600  |
| H | 1.27343200   | -1.78934800 | 4.79527800  |
| C | 7.26980300   | -4.63449900 | -2.17997700 |
| H | -8.12516700  | 0.38224200  | -4.75264500 |
| H | -10.37698000 | 0.61985200  | 1.77936600  |
| C | -3.41579600  | 4.87998300  | -0.15816500 |
| C | -1.26055500  | 3.85448500  | -0.56797600 |
| C | 2.66404200   | -1.67034900 | 2.49112500  |
| O | 7.66238700   | -4.49404000 | -3.43891500 |
| O | 8.05468300   | -4.98864900 | -1.28124400 |
| H | -4.46729200  | 4.78660600  | 0.06859800  |
| C | -2.83014200  | 6.13988800  | -0.26309600 |
| H | -0.60253000  | 2.99732400  | -0.63785500 |
| C | -0.67220900  | 5.12100200  | -0.66175100 |
| H | 2.84903500   | -2.17837900 | 1.54194100  |
| H | 3.05470100   | -2.27886100 | 3.30756600  |
| O | 3.32711700   | -0.39076200 | 2.48191600  |
| H | 8.61119300   | -4.69617800 | -3.50379100 |
| C | -3.62478900  | 7.36863000  | 0.04627300  |
| C | -1.45706500  | 6.27112200  | -0.53049000 |
| O | 0.68330400   | 5.12275400  | -0.84803700 |
| C | 4.68264000   | -0.38900900 | 2.29571700  |
| O | -4.64493200  | 7.28134600  | 0.80798200  |
| H | -1.02046900  | 7.25608700  | -0.58926800 |
| C | 1.34638400   | 6.40234500  | -0.85720600 |
| C | 5.46750000   | -1.53913100 | 2.16445000  |
| C | 5.27101800   | 0.87750600  | 2.20208100  |
| H | 0.95603000   | 7.00967500  | -1.67467900 |
| H | 1.15947200   | 6.90891100  | 0.09146800  |
| C | 2.81226100   | 6.14934700  | -1.04589700 |
| H | 5.03606000   | -2.52649300 | 2.21135700  |
| C | 6.84058000   | -1.40789900 | 1.89706700  |
| H | 4.64986000   | 1.75740500  | 2.29318000  |
| C | 6.63600200   | 0.99806100  | 1.94291900  |
| C | 3.37055800   | 6.26034100  | -2.32332100 |
| C | 3.63468100   | 5.80266200  | 0.03573300  |
| C | 7.63520800   | -2.63663500 | 1.58761300  |
| C | 7.42626600   | -0.14798700 | 1.79226100  |
| C | 7.22729700   | 2.35475500  | 1.75540800  |
| H | 2.73666500   | 6.52135000  | -3.16125300 |
| C | 4.72824100   | 6.05443800  | -2.52310000 |
| H | 3.20882600   | 5.70988200  | 1.02676700  |
| C | 4.99788200   | 5.59678100  | -0.15635500 |
| O | 7.22481000   | -3.75898700 | 2.05075600  |
| H | 8.47742700   | -0.05668500 | 1.55733400  |
| O | 6.60448700   | 3.39142200  | 2.15062200  |

|   |             |             |             |
|---|-------------|-------------|-------------|
| C | 5.55511000  | 5.73017600  | -1.43772900 |
| H | 5.14471800  | 6.14760600  | -3.51541100 |
| H | 5.63250200  | 5.32739000  | 0.67688900  |
| C | 6.99477300  | 5.46396200  | -1.65186000 |
| O | 7.38735700  | 5.60442100  | -2.91079800 |
| O | 7.77965300  | 5.10981300  | -0.75312800 |
| H | 8.33627700  | 5.40278000  | -2.97563700 |
| O | 8.64119300  | -2.55056600 | 0.83650900  |
| H | 9.03600200  | -3.42900800 | 0.68333600  |
| O | 8.34897600  | 2.46399700  | 1.19552100  |
| H | 8.59540300  | 3.40295900  | 1.11009100  |
| O | -3.22182700 | 8.47062700  | -0.40844200 |
| H | -3.77643700 | 9.20471000  | -0.08814800 |
| O | -2.32583900 | -8.74656000 | -1.04050100 |
| H | -2.82619000 | -9.55193300 | -0.81778400 |
| O | -4.35540700 | -2.81563500 | 0.26958300  |
| O | -2.60003500 | 1.35184200  | -0.51201000 |

## 2. Cartesian coordinates for structural optimization of Cd-HCIA-1 in S<sub>1</sub>

|    |             |             |             |
|----|-------------|-------------|-------------|
| Cd | -4.45303700 | -0.19076600 | 0.14359000  |
| O  | -2.94759400 | -1.61434800 | -0.94671900 |
| O  | -4.08389900 | -7.84138200 | -0.07930000 |
| O  | 0.95595700  | -4.97588800 | -1.37678300 |
| O  | -3.78062000 | -0.38672600 | 2.38491300  |
| H  | -4.19294300 | -5.31848900 | -0.45513800 |
| H  | -0.35706000 | -7.12212600 | -1.19440800 |
| H  | -0.75806600 | -2.84288000 | -1.11458000 |
| H  | 1.22526600  | -3.08703600 | -2.20246700 |
| H  | 1.43020400  | -3.18684400 | -0.43734800 |
| H  | -1.63424100 | -0.61286600 | 0.95284100  |
| H  | -1.14348200 | -1.41872100 | 5.14787100  |
| H  | 3.00714500  | -3.57369300 | -3.68974200 |
| H  | -4.22062400 | -0.18251400 | -3.05282300 |
| N  | -5.78363500 | 0.01616600  | -1.72949900 |
| N  | -6.68317700 | 0.01786300  | 0.85624600  |
| C  | -3.35613800 | -2.73753500 | -0.48349500 |
| C  | -2.55940300 | -3.96474700 | -0.79276300 |
| C  | -3.14286200 | -5.22564900 | -0.68768400 |
| C  | -2.35059700 | -6.37035500 | -0.83803400 |
| C  | -0.98578400 | -6.24747700 | -1.09701100 |
| C  | -0.39958900 | -4.97995900 | -1.19077500 |
| C  | -1.18645600 | -3.83117700 | -1.05981500 |
| C  | -2.93956800 | -7.72803800 | -0.65039400 |
| C  | 1.61681400  | -3.69515200 | -1.38610500 |
| C  | 3.08315500  | -3.94564000 | -1.57453300 |
| C  | -1.55464400 | -1.00200200 | 3.06991600  |
| C  | 3.64145300  | -3.83389700 | -2.85189000 |
| C  | -2.99437400 | -0.73732700 | 3.28376900  |
| C  | -5.28975600 | -0.03764500 | -2.97408100 |
| C  | -7.11005100 | 0.18844600  | -1.52795700 |
| C  | -7.59733900 | 0.21972200  | -0.12163900 |
| O  | -4.37635300 | 2.25664700  | 0.44726900  |
| C  | -7.06557300 | 0.03156900  | 2.14245800  |
| C  | 3.90601200  | -4.29071400 | -0.49271700 |
| C  | -0.99744300 | -0.86781200 | 1.78861000  |
| C  | -0.72736800 | -1.32459900 | 4.15547400  |

|   |              |             |             |
|---|--------------|-------------|-------------|
| C | 4.99952200   | -4.03747800 | -3.05142700 |
| O | -3.38732800  | -0.87916400 | 4.54268700  |
| C | -6.09863000  | 0.08168900  | -4.10028900 |
| C | -7.97421200  | 0.32289300  | -2.61736500 |
| C | -8.94727000  | 0.43284800  | 0.19236600  |
| C | -3.23212700  | 2.36995500  | -0.12356000 |
| C | -8.39173400  | 0.23305000  | 2.51920000  |
| H | -6.28311900  | -0.12845700 | 2.87195000  |
| H | 3.48158700   | -4.37722200 | 0.49962100  |
| C | 5.26959600   | -4.49426500 | -0.68456400 |
| C | 0.36614400   | -1.07135700 | 1.59676800  |
| C | 0.63070300   | -1.52817100 | 3.95593800  |
| C | 5.82678600   | -4.36012200 | -1.96587600 |
| H | 5.41608000   | -3.94329800 | -4.04362000 |
| H | -4.33849600  | -0.68441600 | 4.60846900  |
| C | -7.46392900  | 0.26748500  | -3.91130200 |
| H | -5.66387900  | 0.03072800  | -5.08826700 |
| H | -9.03434100  | 0.46105300  | -2.47502300 |
| H | -9.68037200  | 0.59650700  | -0.58157900 |
| C | -9.34847900  | 0.43332900  | 1.52640500  |
| C | -2.64344500  | 3.72770200  | -0.31256700 |
| H | -8.65887800  | 0.23129800  | 3.56647800  |
| H | 5.90705000   | -4.74536300 | 0.15167500  |
| H | 0.78974100   | -0.98320200 | 0.60431000  |
| C | 1.18899900   | -1.41643400 | 2.67858000  |
| H | 1.26456500   | -1.78807900 | 4.79412600  |
| C | 7.26694200   | -4.62387700 | -2.17974400 |
| H | -8.12990700  | 0.36656100  | -4.75778800 |
| H | -10.38717500 | 0.59307600  | 1.78134800  |
| C | -3.43544100  | 4.87241300  | -0.16117700 |
| C | -1.27836300  | 3.85058200  | -0.57048600 |
| C | 2.65534100   | -1.66691700 | 2.49015400  |
| O | 7.65947200   | -4.48295200 | -3.43864600 |
| O | 8.05229800   | -4.97651200 | -1.28083100 |
| H | -4.48563500  | 4.77742900  | 0.06999700  |
| C | -2.85195600  | 6.13331300  | -0.26623500 |
| H | -0.65614000  | 2.97184200  | -0.66643400 |
| C | -0.69219900  | 5.11810100  | -0.66438900 |
| H | 2.84140600   | -2.17477200 | 1.54112200  |
| H | 3.04707300   | -2.27451900 | 3.30679800  |
| O | 3.1619800    | -0.38618500 | 2.48082600  |
| H | 8.60866300   | -4.68329300 | -3.50329300 |
| C | -3.64877900  | 7.36072900  | 0.04280400  |
| C | -1.47906800  | 6.26688200  | -0.53344300 |
| O | 0.66333700   | 5.12217100  | -0.85047000 |
| C | 4.67174400   | -0.38211400 | 2.29483200  |
| O | -4.66888400  | 7.27180600  | 0.80437300  |
| H | -1.04452900  | 7.25286800  | -0.59180000 |
| C | 1.32419900   | 6.40290800  | -0.85975700 |
| C | 5.45861700   | -1.53089600 | 2.16388100  |
| C | 5.25794000   | 0.88540300  | 2.20106900  |
| H | 0.93323400   | 7.01030300  | -1.67704900 |
| H | 1.13673900   | 6.91001300  | 0.08865600  |
| C | 2.79054100   | 6.15242000  | -1.04818300 |
| H | 5.02881800   | -2.51897500 | 2.21067200  |
| C | 6.83150800   | -1.39732900 | 1.89668300  |
| H | 4.63510600   | 1.76418800  | 2.29155300  |

|   |             |             |             |
|---|-------------|-------------|-------------|
| C | 6.62275200  | 1.00828000  | 1.94209300  |
| C | 3.34883800  | 6.26416300  | -2.32554200 |
| C | 3.61339700  | 5.80734500  | 0.03363100  |
| C | 7.62831100  | -2.62473900 | 1.58756000  |
| C | 7.41502500  | -0.13642200 | 1.79175000  |
| C | 7.21172300  | 2.36596500  | 1.75443900  |
| H | 2.71453100  | 6.52365600  | -3.16362900 |
| C | 4.70690700  | 6.06058000  | -2.52508000 |
| H | 3.18740500  | 5.71362000  | 1.02451300  |
| C | 4.97698200  | 5.60379500  | -0.15821600 |
| O | 7.21978900  | -3.74772100 | 2.05083300  |
| H | 8.46603500  | -0.04333200 | 1.55683200  |
| O | 6.58705700  | 3.40161800  | 2.14938200  |
| C | 5.53417200  | 5.73793700  | -1.43952800 |
| H | 5.12340900  | 6.15405300  | -3.51736400 |
| H | 5.61189800  | 5.33522900  | 0.67507400  |
| C | 6.97432700  | 5.47418200  | -1.65339600 |
| O | 7.36685700  | 5.61510700  | -2.91229800 |
| O | 7.75968300  | 5.12154800  | -0.75448400 |
| H | 8.31598700  | 5.41448100  | -2.97704000 |
| O | 8.63426000  | -2.53705400 | 0.83659300  |
| H | 9.03025100  | -3.41493800 | 0.68331200  |
| O | 8.33329600  | 2.47705600  | 1.19470300  |
| H | 8.57777400  | 3.41644900  | 1.10853900  |
| O | -3.24765900 | 8.46334500  | -0.41203900 |
| H | -3.80289200 | 9.19660200  | -0.09129800 |
| O | -2.32173100 | -8.75237100 | -1.04101700 |
| H | -2.82076500 | -9.55842700 | -0.81830700 |
| O | -4.36177500 | -2.82474900 | 0.26774500  |
| O | -2.61351200 | 1.34563100  | -0.51429500 |

## References

- 1 L.-B. Wang, J.-J. Wang, E.-L. Yue, J.-F. Li, L. Tang, X. Wang, X.-Y. Hou, Y. Zhang, Y.-X. Ren and X.-L. Chen, *Dyes Pigments*, 2022, **197**, 109863.
- 2 C. Zhou, J. Xie, S. Zheng, Y. Chen and W. Gao, *Inorg. Chem. Commun.*, 2022, **143**, 109789
- 3 H. Yang, D. Qi, Z. Chen, M. Cao, Y. Deng, Z. Liu, C. Shao and L. Yang, *J. Solid State Chem.*, 2021, **296**, 121970.
- 4 T. Zhang, J. Qin, Y. Li, K. Huang and L. Cui, *J. Inorg. Organomet. P.*, 2022, **32**, 2763-2770.
- 5 S.-L. Sun, X.-Y. Sun, Q. Sun, E.-Q. Gao, J.-L. Zhang and W.-J. Li, *J. Solid State Chem.*, 2020, **292**, 121701.
- 6 S. Xian, H.-L. Chen, W.-L. Feng, X.-Z. Yang, Y.-Q. Wang and B.-X. Li, *J. Solid State Chem.*, 2019, **280**, 120984.
- 7 K. P. Bai, L. J. Zhou, G. P. Yang, M. X. Cao and Y. Y. Wang, *ChemistrySelect*, 2019, **4**, 12794-12800.
- 8 M. I. M. Shahid, H. A. M. Saleh, K. M. A. Qasem and M. Ahmad, *CrystEngComm*, 2020, **22**, 3891-3909.
